# Supplementary material
Source: PubMed Central journal article supplement (PMC5741429)
Supplement: supp_5.4.E760_strobe.pdf [file supp_5.4.E760_strobe.pdf]

This table is modified from and used with the permission of The STROBE Initiative,  
[www.strobe-statement.org](http://www.strobe-statement.org).

**Impact of restricting diagnostic imaging reimbursement for uncomplicated back pain in Ontario: a population-based interrupted time-series analysis**

|                      | Item No | Recommendation                                                                                                                                                                                                                                                                                                                                                                                                                                 | Please insert check where included or N/A where not applicable                                                                 |
|----------------------|---------|------------------------------------------------------------------------------------------------------------------------------------------------------------------------------------------------------------------------------------------------------------------------------------------------------------------------------------------------------------------------------------------------------------------------------------------------|--------------------------------------------------------------------------------------------------------------------------------|
| Title and abstract   | 1       | (a) Indicate the study’s design with a commonly used termin the title or the abstract                                                                                                                                                                                                                                                                                                                                                          | Design included in revised title                                                                                               |
|                      |         | (b) Provide in the abstract an informative and balanced summary of what was done and what was found                                                                                                                                                                                                                                                                                                                                            | Abstract covers main points and has been shortened                                                                             |
| Introduction         |         |                                                                                                                                                                                                                                                                                                                                                                                                                                                |                                                                                                                                |
| Background/rationale | 2       | Explain the scientific background and rationale for the investigation being reported                                                                                                                                                                                                                                                                                                                                                           | YES                                                                                                                            |
| Objectives           | 3       | State specific objectives, including any prespecified hypotheses                                                                                                                                                                                                                                                                                                                                                                               | YES                                                                                                                            |
| Methods              |         |                                                                                                                                                                                                                                                                                                                                                                                                                                                |                                                                                                                                |
| Study design         | 4       | Present key elements of study design early in the paper                                                                                                                                                                                                                                                                                                                                                                                        | YES                                                                                                                            |
| Setting              | 5       | Describe the setting, locations, and relevant dates, including periods of recruitment, treatment, follow-up, and data collection                                                                                                                                                                                                                                                                                                               | YES                                                                                                                            |
| Participants         | 6       | (a) Cohort study—Give the eligibility criteria, and the sources and methods of selection of participants. Describe methods of follow-up<br>Case-control study—Give the eligibility criteria, and the sources and methods of case ascertainment and control selection. Give the rationale for the choice of cases and controls<br>Cross-sectional study—Give the eligibility criteria, and the sources and methods of selection of participants | This is not a cohort or case control study. It uses interrupted time series analysis of repeated complete cross-sectional data |
|                      |         | (b) Cohort study—For matched studies, give matching criteria and number of treated and untreated<br>Case-control study—For matched studies, give matching criteria and the number of controls per case                                                                                                                                                                                                                                         |                                                                                                                                |

|                              |     |                                                                                                                                                                                                                                                                                                           |                                                                                                            |
|------------------------------|-----|-----------------------------------------------------------------------------------------------------------------------------------------------------------------------------------------------------------------------------------------------------------------------------------------------------------|------------------------------------------------------------------------------------------------------------|
| Participants                 | 13* | (a) Report numbers of individuals at each stage of study—eg numbers potentially eligible, examined for eligibility, confirmed eligible, included in the study, completing follow-up, and analysed                                                                                                         | The ‘participants’ are test ordering physicians – classified as family practitioners and specialists       |
|                              |     | (b) Give reasons for non-participation at each stage                                                                                                                                                                                                                                                      | N/A – all are included                                                                                     |
| Descriptive data             | 14* | (a) Give characteristics of study participants (eg demographic, clinical, social) and information on other treatments and potential confounders                                                                                                                                                           | See above                                                                                                  |
|                              |     | (b) Indicate number of participants with missing data for each variable of interest                                                                                                                                                                                                                       | The data are complete – all tests were matched to an ordering physician                                    |
|                              |     | (c) <i>Cohort study</i> —Summarise follow-up time (eg, average and total amount)                                                                                                                                                                                                                          | Repeated cross-sectional study for 6 years                                                                 |
| Variables                    | 7   | Clearly define all outcomes, treatments, predictors, potential confounders, and effect modifiers. Give diagnostic criteria, if applicable                                                                                                                                                                 | N/A                                                                                                        |
| Data sources/<br>measurement | 8*  | For each variable of interest, give sources of data and details of methods of assessment (measurement). Describe comparability of assessment methods if there is more than one group                                                                                                                      | YES                                                                                                        |
| Bias                         | 9   | Describe any efforts to address potential sources of bias                                                                                                                                                                                                                                                 | The limitations in terms of other background interventions that could influence the outcomes are discussed |
| Study size                   | 10  | Explain how the study size was arrived at                                                                                                                                                                                                                                                                 | N/A – we included all tests ordered during the study period                                                |
| Quantitative variables       | 11  | Explain how quantitative variables were handled in the analyses. If applicable, describe which groupings were chosen and why                                                                                                                                                                              | YES                                                                                                        |
| Statistical methods          | 12  | (a) Describe all statistical methods, including those used to control for confounding                                                                                                                                                                                                                     | YES                                                                                                        |
|                              |     | (b) Describe any methods used to examine subgroups and interactions                                                                                                                                                                                                                                       | YES                                                                                                        |
|                              |     | (c) Explain how missing data were addressed                                                                                                                                                                                                                                                               | N/A see above                                                                                              |
|                              |     | (d) <i>Cohort study</i> —If applicable, explain how loss to follow-up was addressed<br><i>Case-control study</i> —If applicable, explain how matching of cases and controls was addressed<br><i>Cross-sectional study</i> —If applicable, describe analytical methods taking account of sampling strategy | N/A                                                                                                        |
|                              |     | (e) Describe any sensitivity analyses                                                                                                                                                                                                                                                                     | N/A                                                                                                        |

\*Give information separately for cases and controls.
